# Supplementary material for: Naringin Supplementation during Pregnancy Induces Sex and Region-Specific Alterations in the Offspring’s Brain Redox Status
Source: MDPI journal article supplement (doi:10.3390/ijerph18094805), 2021-04-30
Supplement: s1 [file s1]

**Supplementary table S1:** Statistical data from the biochemical analyses performed in the offspring's prefrontal cortex.

| Prefrontal cortex                   |                               |                         |                   |                         |                    |                         |
|-------------------------------------|-------------------------------|-------------------------|-------------------|-------------------------|--------------------|-------------------------|
| Postnatal day 1                     |                               |                         |                   |                         |                    |                         |
| <i>Parameter</i>                    | <i>Supplementation effect</i> |                         | <i>Sex effect</i> |                         | <i>Interaction</i> |                         |
|                                     | <i>p value</i>                | <i>Statistical data</i> | <i>p value</i>    | <i>Statistical data</i> | <i>p value</i>     | <i>Statistical data</i> |
| 2',7'-dichlorofluorescein oxidation | 0.770                         | F(1,34)=0.087           | <0.001            | F(1,34)=68.661          | 0.780              | F(1,34)=0.079           |
| Superoxide dismutase activity       | 0.392                         | F(1,32)=0.752           | 0.592             | F(1,32)=0.292           | 0.956              | F(1,32)=0.003           |
| Glutathione peroxidase activity     | 0.024                         | F(1,31)=5.598           | 0.003             | F(1,31)=10.710          | 0.330              | F(1,31)=0.978           |
| Catalase activity                   | 0.610                         | F(1,34)=0.265           | 0.100             | F(1,34)=2.854           | 0.157              | F(1,34)=2.098           |

|                                     |       |               |        |                |       |                |
|-------------------------------------|-------|---------------|--------|----------------|-------|----------------|
| Glyoxalase activity                 | 0.349 | F(1,34)=0.901 | 0.048  | F(1,34)=4.212  | 0.427 | F(1,34)=0.648  |
| Reduced glutathione content         | 0.669 | F(1,23)=0.187 | 0.397  | F(1,23)=0.746  | 0.972 | F(1,23)=0.001  |
| SOD/GPx ratio                       | 0.886 | F(1,26)=0.021 | 0.029  | F(1,26)=5.378  | 0.563 | F(1,26)=0.344  |
| <i>Postnatal day 7</i>              |       |               |        |                |       |                |
| 2',7'-dichlorofluorescein oxidation | 0.437 | F(1,32)=0.620 | <0.001 | F(1,32)=15.350 | 0.190 | F(1,32)=1.792  |
| Superoxide dismutase activity       | 0.189 | F(1,33)=1.795 | 0.981  | F(1,33)=0.001  | 0.002 | F(1,33)=11.050 |
| Glutathione peroxidase activity     | 0.833 | F(1,33)=0.045 | 0.004  | F(1,33)=9.834  | 0.008 | F(1,33)=8.050  |
| Catalase activity                   | 0.067 | F(1,30)=3.607 | 0.038  | F(1,30)=4.701  | 0.442 | F(1,30)=0.606  |
| Glyoxalase activity                 | 0.787 | F(1,35)=0.074 | 0.001  | F(1,35)=13.239 | 0.026 | F(1,35)=5.433  |
| Reduced glutathione content         | 0.012 | F(1,33)=7.095 | 0.110  | F(1,33)=2.695  | 0.390 | F(1,33)=0.758  |
| SOD/GPx ratio                       | 0.274 | F(1,27)=1.249 | 0.038  | F(1,27)=4.764  | 0.514 | F(1,27)=0.436  |
| <i>Postnatal day 21</i>             |       |               |        |                |       |                |
| 2',7'-dichlorofluorescein oxidation | 0.359 | F(1,26)=0.359 | 0.446  | F(1,26)=0.599  | 0.887 | F(1,26)=0.021  |

|                                 |       |               |       |               |       |               |
|---------------------------------|-------|---------------|-------|---------------|-------|---------------|
| Superoxide dismutase activity   | 0.785 | F(1,28)=0.076 | 0.011 | F(1,28)=7.418 | 0.792 | F(1,28)=0.071 |
| Glutathione peroxidase activity | 0.111 | F(1,28)=2.712 | 0.009 | F(1,28)=7.934 | 0.565 | F(1,28)=0.340 |
| Catalase activity               | 0.449 | F(1,25)=0.591 | 0.188 | F(1,25)=1.828 | 0.084 | F(1,25)=3.243 |
| Glyoxalase activity             | 0.541 | F(1,28)=0.383 | 0.194 | F(1,28)=1.772 | 0.548 | F(1,28)=0.370 |
| Reduced glutathione content     | 0.481 | F(1,25)=0.511 | 0.362 | F(1,25)=0.862 | 0.717 | F(1,25)=0.135 |
| SOD/GPx ratio                   | 0.022 | F(1,23)=6.063 | 0.944 | F(1,23)=0.005 | 0.790 | F(1,23)=0.072 |
