# Supplementary material for: Naringin Supplementation during Pregnancy Induces Sex and Region-Specific Alterations in the Offspring’s Brain Redox Status
Source: MDPI journal article supplement (doi:10.3390/ijerph18094805), 2021-04-30
Supplement: s1 [file s1]

**Supplementary table S4:** Statistical data from the biochemical analyses performed in the offspring's cerebellum.

| Cerebellum                          |                               |                         |                   |                         |                    |                         |
|-------------------------------------|-------------------------------|-------------------------|-------------------|-------------------------|--------------------|-------------------------|
| Postnatal day 1                     |                               |                         |                   |                         |                    |                         |
| <i>Parameter</i>                    | <i>Supplementation effect</i> |                         | <i>Sex effect</i> |                         | <i>Interaction</i> |                         |
|                                     | <i>p value</i>                | <i>Statistical data</i> | <i>p value</i>    | <i>Statistical data</i> | <i>p value</i>     | <i>Statistical data</i> |
| 2',7'-dichlorofluorescein oxidation | 0.332                         | F(1,40)=0.963           | 0.641             | F(1,40)=0.221           | 0.967              | F(1,40)=0.002           |
| Superoxide dismutase activity       | 0.282                         | F(1,36)=1.195           | <0.001            | F(1,36)=15.604          | 0.799              | F(1,36)=0.066           |
| Glutathione peroxidase activity     | 0.152                         | F(1,43)=2.127           | 0.004             | F(1,43)=9.085           | 0.792              | F(1,43)=0.070           |
| Catalase activity                   | 0.838                         | F(1,39)=0.042           | <0.001            | F(1,39)=18.112          | 0.631              | F(1,39)=0.234           |

|                                     |       |                |        |                 |       |                |
|-------------------------------------|-------|----------------|--------|-----------------|-------|----------------|
| Glyoxalase activity                 | 0.630 | F(1,36)=0.236  | 0.521  | F(1,36)=0.421   | 0.414 | F(1,36)=0.683  |
| Reduced glutathione content         | 0.263 | F(1,34)=1.297  | 0.003  | F(1,34)=10.543  | 0.263 | F(1,34)=1.297  |
| SOD/GPx ratio                       | 0.545 | F(1,33)=0.373  | <0.001 | F(1,33)=30.743  | 0.338 | F(1,33)=0.946  |
| <i>Postnatal day 7</i>              |       |                |        |                 |       |                |
| 2',7'-dichlorofluorescein oxidation | 0.003 | F(1,36)=10.109 | <0.001 | F(1,36)=196.026 | 0.021 | F(1,36)=5.848  |
| Superoxide dismutase activity       | 0.001 | F(1,36)=13.953 | <0.001 | F(1,36)=24.983  | 0.470 | F(1,36)=0.533  |
| Glutathione peroxidase activity     | 0.012 | F(1,36)=6.941  | <0.001 | F(1,36)=30.964  | 0.485 | F(1,36)=33.507 |
| Catalase activity                   | 0.420 | F(1,34)=0.667  | 0.243  | F(1,34)=1.409   | 0.476 | F(1,34)=0.518  |
| Glyoxalase activity                 | 0.015 | F(1,36)=6.595  | 0.776  | F(1,36)=0.082   | 0.494 | F(1,36)=0.477  |
| Reduced glutathione content         | 0.061 | F(1,36)=3.751  | 0.002  | F(1,36)=10.597  | 0.183 | F(1,36)=1.847  |
| SOD/GPx ratio                       | 0.109 | F(1,33)=2.717  | <0.001 | F(1,33)=119.267 | 0.335 | F(1,33)=0.958  |
| <i>Postnatal day 21</i>             |       |                |        |                 |       |                |
| 2',7'-dichlorofluorescein oxidation | 0.697 | F(1,28)=0.155  | 0.022  | F(1,28)=5.892   | 0.590 | F(1,28)=0.297  |

|                                 |       |               |       |                |       |               |
|---------------------------------|-------|---------------|-------|----------------|-------|---------------|
| Superoxide dismutase activity   | 0.090 | F(1,28)=3.092 | 0.653 | F(1,28)=0.206  | 0.035 | F(1,28)=4.921 |
| Glutathione peroxidase activity | 0.637 | F(1,28)=0.228 | 0.006 | F(1,28)=8.785  | 0.083 | F(1,28)=3.227 |
| Catalase activity               | 0.063 | F(1,28)=3.763 | 0.763 | F(1,28)=0.092  | 0.324 | F(1,28)=1.010 |
| Glyoxalase activity             | 0.016 | F(1,28)=6.559 | 0.004 | F(1,28)=9.643  | 0.031 | F(1,28)=5.163 |
| Reduced glutathione content     | 0.783 | F(1,27)=0.077 | 0.004 | F(1,27)=10.187 | 0.298 | F(1,27)=1.127 |
| SOD/GPx ratio                   | 0.187 | F(1,27)=1.837 | 0.006 | F(1,27)=8.714  | 0.889 | F(1,27)=0.020 |
