# Supplementary material for: Naringin Supplementation during Pregnancy Induces Sex and Region-Specific Alterations in the Offspring’s Brain Redox Status
Source: MDPI journal article supplement (doi:10.3390/ijerph18094805), 2021-04-30
Supplement: s1 [file s1]

**Supplementary table S2:** Statistical data from the biochemical analyses performed in the offspring's hippocampus.

| Hippocampus                         |                               |                         |                   |                         |                    |                         |
|-------------------------------------|-------------------------------|-------------------------|-------------------|-------------------------|--------------------|-------------------------|
| Postnatal day 1                     |                               |                         |                   |                         |                    |                         |
| <i>Parameter</i>                    | <i>Supplementation effect</i> |                         | <i>Sex effect</i> |                         | <i>Interaction</i> |                         |
|                                     | <i>p value</i>                | <i>Statistical data</i> | <i>p value</i>    | <i>Statistical data</i> | <i>p value</i>     | <i>Statistical data</i> |
| 2',7'-dichlorofluorescein oxidation | 0.863                         | F(1,37)=0.030           | 0.006             | F(1,37)=8.636           | 0.860              | F(1,37)=0.031           |
| Superoxide dismutase activity       | 0.795                         | F(1,39)=0.068           | 0.014             | F(1,39)=6.680           | 0.260              | F(1,39)=1.307           |
| Glutathione peroxidase activity     | 0.001                         | F(1,42)=12.539          | <0.001            | F(1,42)=16.927          | 0.934              | F(1,42)=0.007           |
| Catalase activity                   | 0.078                         | F(1,33)=3.307           | 0.092             | F(1,33)=3.021           | 0.931              | F(1,33)=0.008           |

|                                     |        |                |        |                |       |               |
|-------------------------------------|--------|----------------|--------|----------------|-------|---------------|
| Glyoxalase activity                 | 0.152  | F(1,36)=2.143  | 0.159  | F(1,36)=2.066  | 0.071 | F(1,36)=3.470 |
| Reduced glutathione content         | 0.003  | F(1,29)=10.193 | 0.002  | F(1,29)=11.897 | 0.981 | F(1,29)=0.001 |
| SOD/GPx ratio                       | 0.631  | F(1,31)=0.235  | 0.324  | F(1,31)=1.004  | 0.152 | F(1,31)=2.155 |
| <i>Postnatal day 7</i>              |        |                |        |                |       |               |
| 2',7'-dichlorofluorescein oxidation | 0.184  | F(1,36)=1.839  | <0.001 | F(1,36)=28.105 | 0.314 | F(1,36)=1.044 |
| Superoxide dismutase activity       | 0.314  | F(1,35)=1.049  | 0.101  | F(1,35)=2.836  | 0.829 | F(1,35)=0.047 |
| Glutathione peroxidase activity     | 0.026  | F(1,34)=5.422  | <0.001 | F(1,34)=36.052 | 0.680 | F(1,34)=0.173 |
| Catalase activity                   | 0.052  | F(1,34)=4.063  | 0.535  | F(1,34)=0.392  | 0.864 | F(1,34)=0.030 |
| Glyoxalase activity                 | <0.001 | F(1,35)=16.209 | 0.548  | F(1,35)=0.392  | 0.809 | F(1,35)=0.059 |
| Reduced glutathione content         | 0.002  | F(1,35)=11.822 | 0.419  | F(1,35)=0.670  | 0.854 | F(1,35)=0.034 |
| SOD/GPx ratio                       | 0.013  | F(1,33)=6.884  | 0.005  | F(1,33)=9.251  | 0.416 | F(1,33)=0.677 |
| <i>Postnatal day 21</i>             |        |                |        |                |       |               |
| 2',7'-dichlorofluorescein oxidation | 0.905  | F(1,29)=0.014  | 0.045  | F(1,29)=4.393  | 0.743 | F(1,29)=0.109 |

|                                 |       |               |       |               |       |               |
|---------------------------------|-------|---------------|-------|---------------|-------|---------------|
| Superoxide dismutase activity   | 0.315 | F(1,30)=1.045 | 0.262 | F(1,30)=1.309 | 0.556 | F(1,30)=0.354 |
| Glutathione peroxidase activity | 0.481 | F(1,30)=0.508 | 0.480 | F(1,30)=0.511 | 0.703 | F(1,30)=0.148 |
| Catalase activity               | 0.214 | F(1,30)=1.611 | 0.037 | F(1,30)=4.755 | 0.353 | F(1,30)=0.891 |
| Glyoxalase activity             | 0.039 | F(1,30)=4.671 | 0.990 | F(1,30)=0.000 | 0.511 | F(1,30)=0.442 |
| Reduced glutathione content     | 0.524 | F(1,30)=0.416 | 0.006 | F(1,30)=8.621 | 0.279 | F(1,30)=1.215 |
| SOD/GPx ratio                   | 0.363 | F(1,29)=0.854 | 0.149 | F(1,29)=2.199 | 0.714 | F(1,29)=0.137 |
