# Supplementary material for: Naringin Supplementation during Pregnancy Induces Sex and Region-Specific Alterations in the Offspring’s Brain Redox Status
Source: MDPI journal article supplement (doi:10.3390/ijerph18094805), 2021-04-30
Supplement: s1 [file s1]

**Supplementary table S3:** Statistical data from the biochemical analyses performed in the offspring's striatum.

| Striatum                            |                               |                         |                   |                         |                    |                         |
|-------------------------------------|-------------------------------|-------------------------|-------------------|-------------------------|--------------------|-------------------------|
| Postnatal day 1                     |                               |                         |                   |                         |                    |                         |
| <i>Parameter</i>                    | <i>Supplementation effect</i> |                         | <i>Sex effect</i> |                         | <i>Interaction</i> |                         |
|                                     | <i>p value</i>                | <i>Statistical data</i> | <i>p value</i>    | <i>Statistical data</i> | <i>p value</i>     | <i>Statistical data</i> |
| 2',7'-dichlorofluorescein oxidation | 0.007                         | F(1,36)=8.249           | <0.001            | F(1,36)=41.348          | 0.058              | F(1,36)=3.846           |
| Superoxide dismutase activity       | 0.340                         | F(1,36)=0.340           | 0.668             | F(1,36)=0.187           | 0.839              | F(1,36)=0.042           |
| Glutathione peroxidase activity     | 0.092                         | F(1,36)=2.989           | 0.187             | F(1,36)=1.813           | 0.704              | F(1,36)=0.146           |
| Catalase activity                   | 0.221                         | F(1,36)=1.554           | 0.444             | F(1,36)=0.600           | 0.775              | F(1,36)=0.083           |

|                                     |       |                |        |                |         |               |
|-------------------------------------|-------|----------------|--------|----------------|---------|---------------|
| Glyoxalase activity                 | 0.988 | F(1,36)=0.000  | 0.885  | F(1,36)=0.021  | 0.798   | F(1,36)=0.066 |
| Reduced glutathione content         | 0.345 | F(1,31)=0.918  | 0.745  | F(1,31)=0.107  | 0.724   | F(1,31)=0.127 |
| SOD/GPx ratio                       | 0.921 | F(1,36)=0.010  | 0.272  | F(1,36)=1.244  | 0.938   | F(1,36)=0.006 |
| <i>Postnatal day 7</i>              |       |                |        |                |         |               |
| 2',7'-dichlorofluorescein oxidation | 0.214 | F(1,32)=1.609  | 0.003  | F(1,32)=10.552 | p=0.008 | F(1,32)=7.865 |
| Superoxide dismutase activity       | 0.326 | F(1,35)=0.991  | 0.002  | F(1,35)=10.962 | 0.079   | F(1,35)=3.275 |
| Glutathione peroxidase activity     | 0.003 | F(1,35)=10.199 | 0.347  | F(1,35)=0.347  | 0.595   | F(1,35)=0.288 |
| Catalase activity                   | 0.272 | F(1,36)=1.242  | 0.937  | F(1,36)=0.006  | 0.049   | F(1,36)=4.146 |
| Glyoxalase activity                 | 0.033 | F(1,35)=16.435 | <0.001 | F(1,35)=16.435 | 0.020   | F(1,35)=5.940 |
| Reduced glutathione content         | 0.062 | F(1,29)=14.844 | 0.798  | F(1,29)=0.067  | 0.839   | F(1,29)=0.042 |
| SOD/GPx ratio                       | 0.001 | F(1,33)=14.746 | 0.057  | F(1,33)=3.898  | 0.115   | F(1,33)=2.626 |
| <i>Postnatal day 21</i>             |       |                |        |                |         |               |
| 2',7'-dichlorofluorescein oxidation | 0.623 | F(1,34)=0.246  | 0.113  | F(1,34)=2.652  | 0.093   | F(1,34)=0.006 |

|                                 |       |               |       |               |       |               |
|---------------------------------|-------|---------------|-------|---------------|-------|---------------|
| Superoxide dismutase activity   | 0.981 | F(1,28)=0.001 | 0.742 | F(1,28)=0.111 | 0.235 | F(1,28)=1.473 |
| Glutathione peroxidase activity | 0.112 | F(1,31)=2.669 | 0.436 | F(1,31)=0.624 | 0.944 | F(1,31)=0.005 |
| Catalase activity               | 0.344 | F(1,31)=0.923 | 0.321 | F(1,31)=1.015 | 0.093 | F(1,31)=3.006 |
| Glyoxalase activity             | 0.831 | F(1,34)=0.046 | 0.907 | F(1,34)=0.014 | 0.591 | F(1,34)=0.295 |
| Reduced glutathione content     | 0.042 | F(1,34)=4.448 | 0.222 | F(1,34)=1.550 | 0.496 | F(1,34)=0.473 |
| SOD/GPx ratio                   | 0.255 | F(1,23)=1.361 | 0.956 | F(1,23)=0.003 | 0.175 | F(1,23)=1.958 |
